# Supplementary material
Source: PubMed Central journal article supplement (PMC3462257)

**A**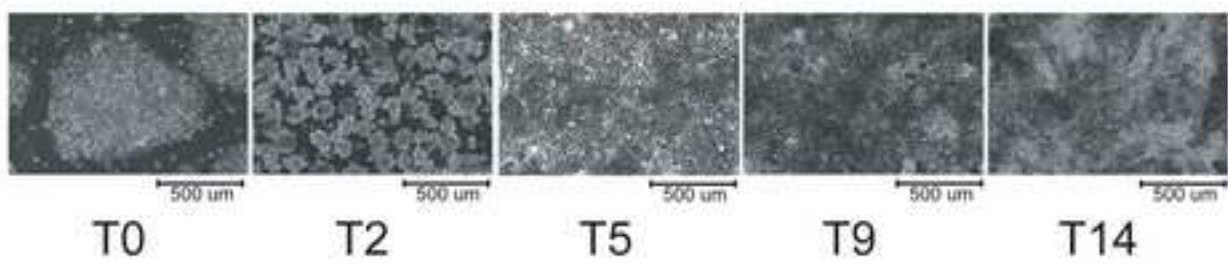**B**

T0

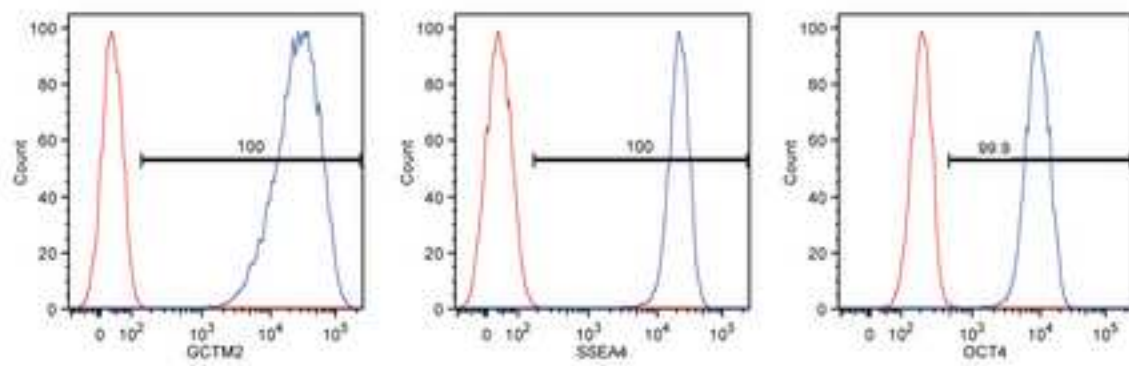**C**

T5

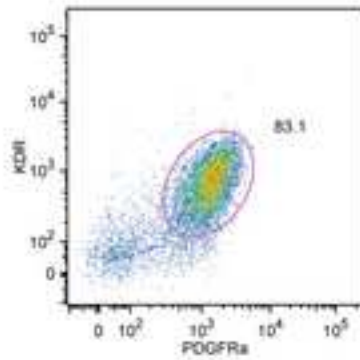**D**

T14

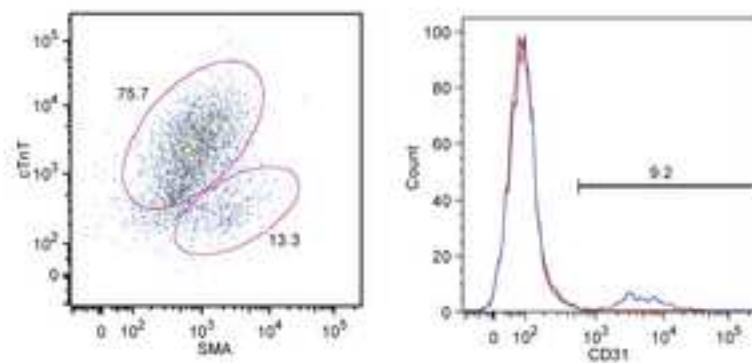

**A**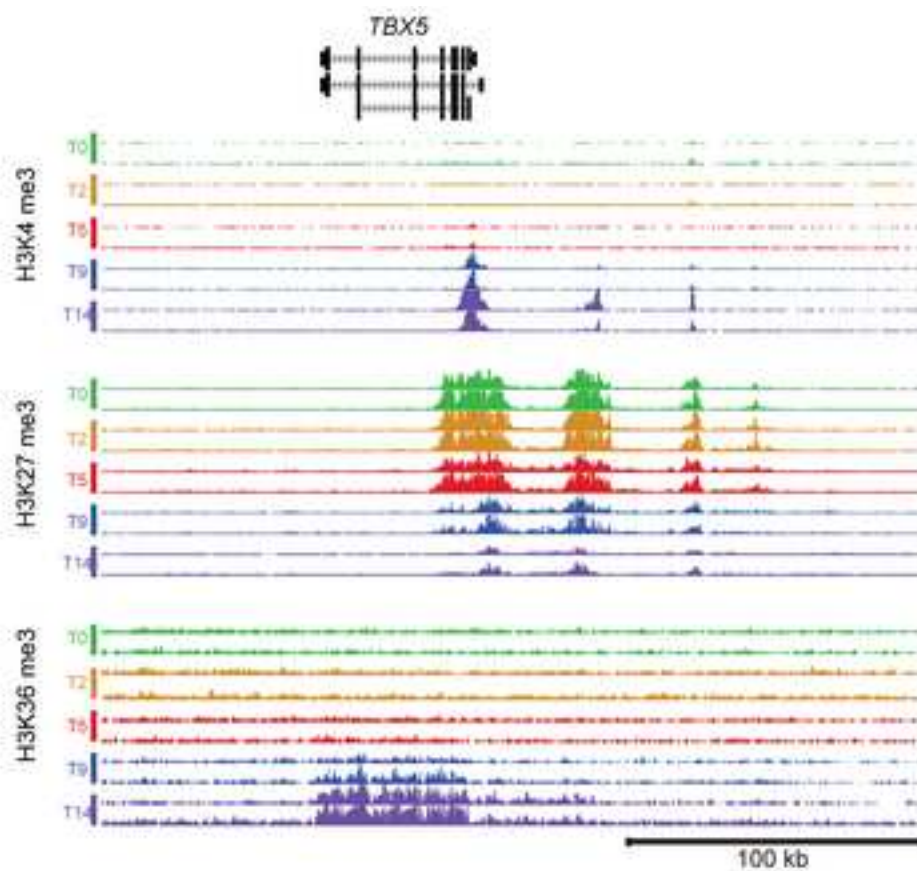**B**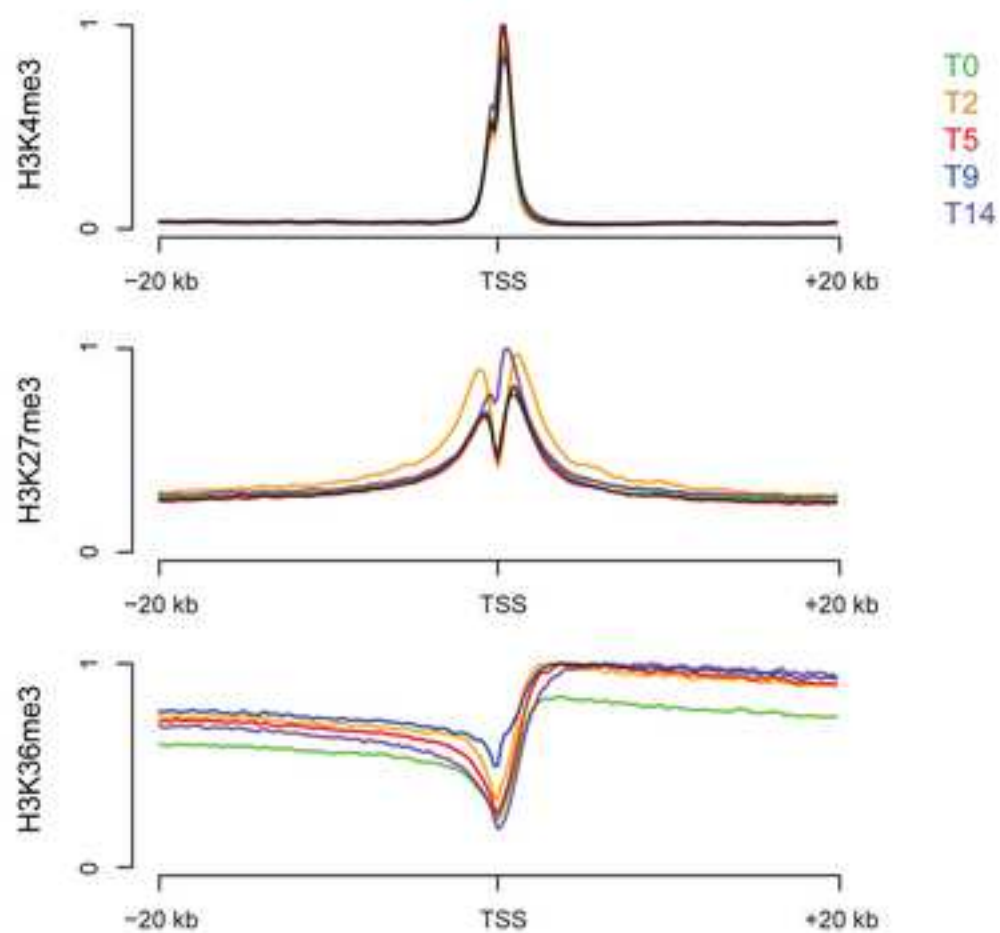

A

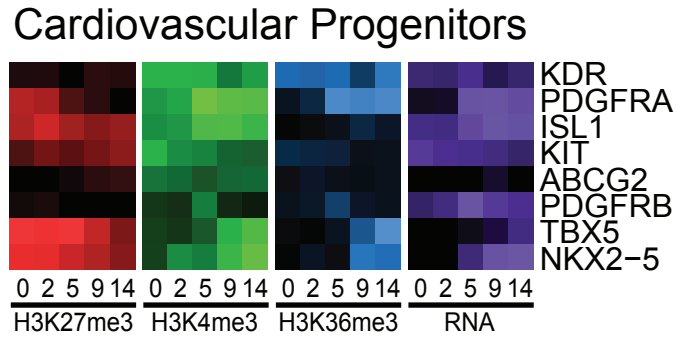

B

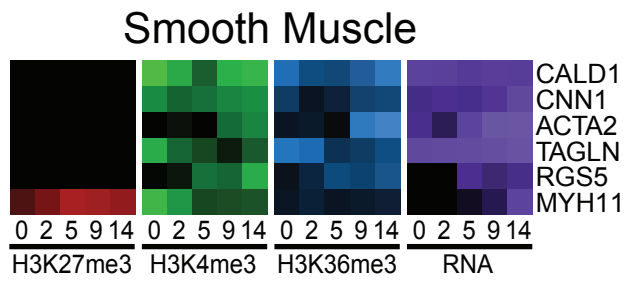

C

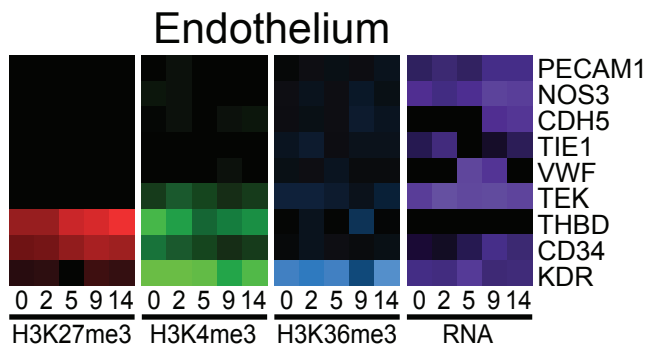



F

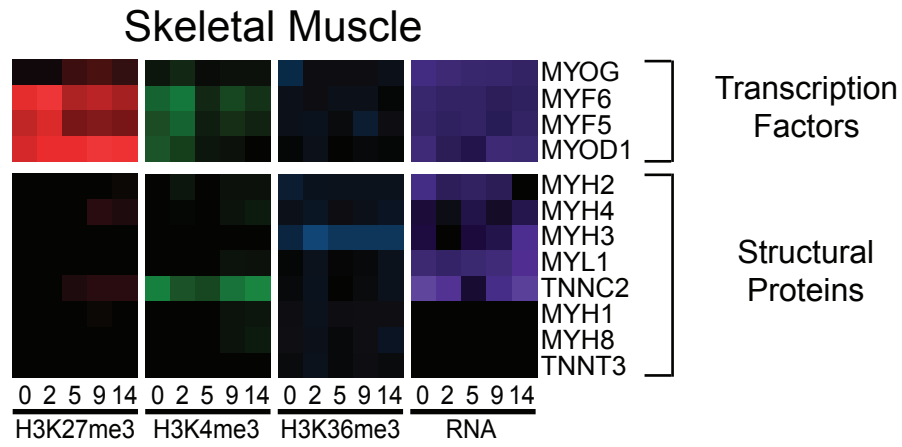

G

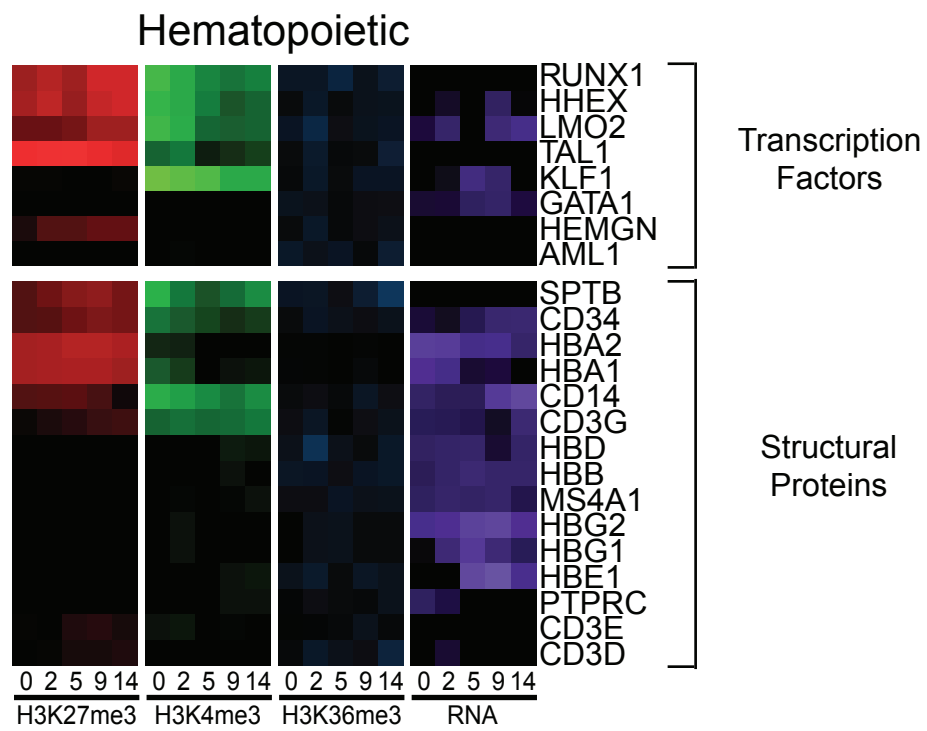

H

### Neuroectoderm

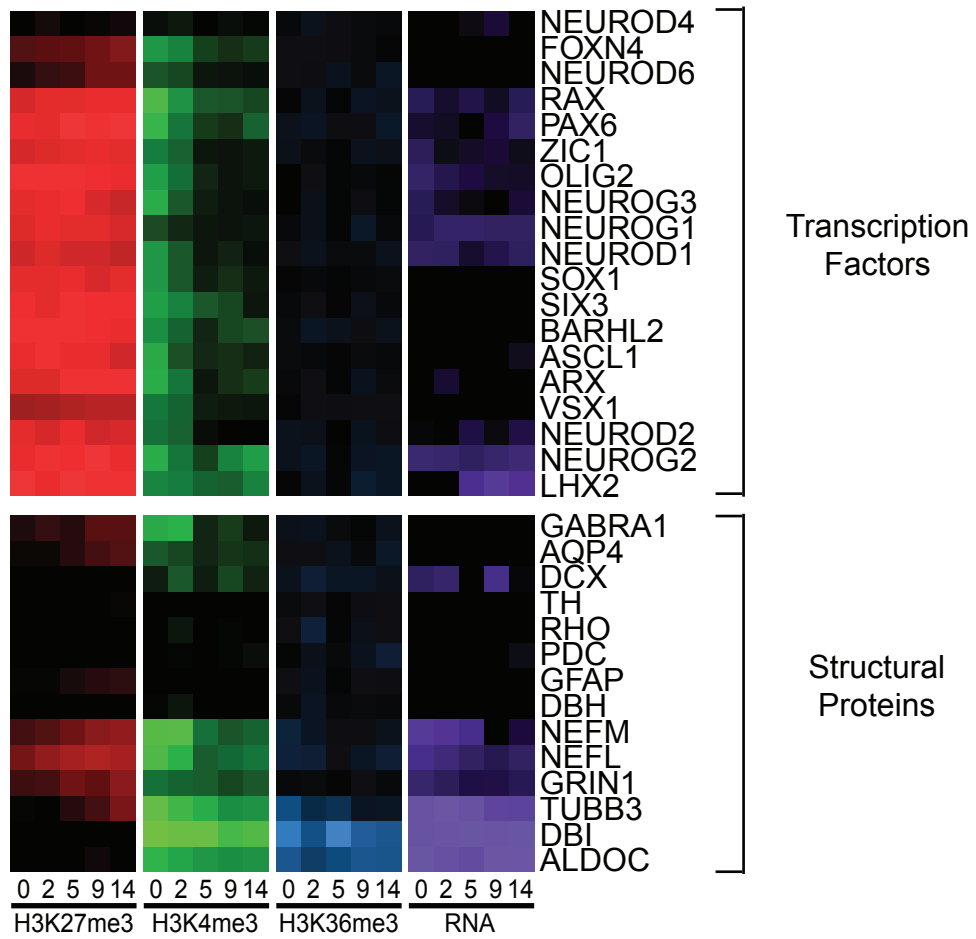

I

### Endoderm

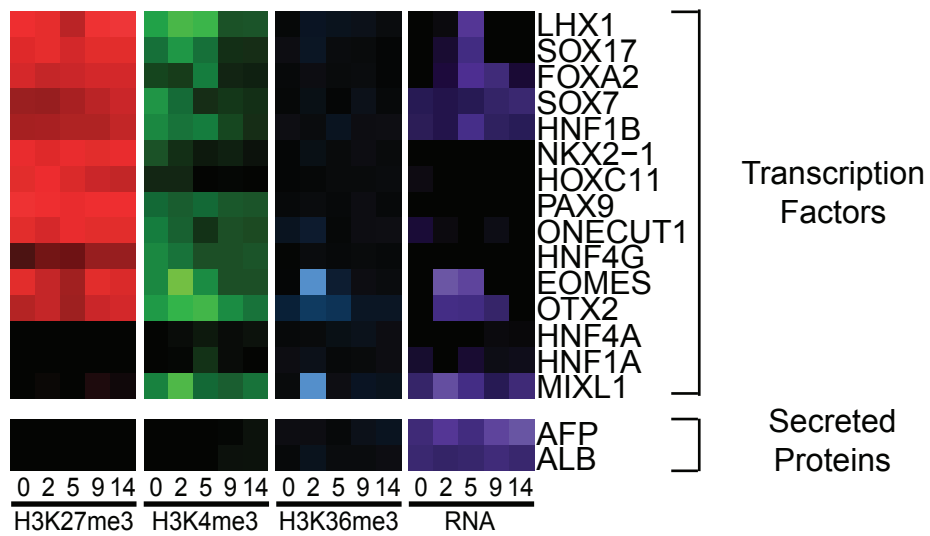



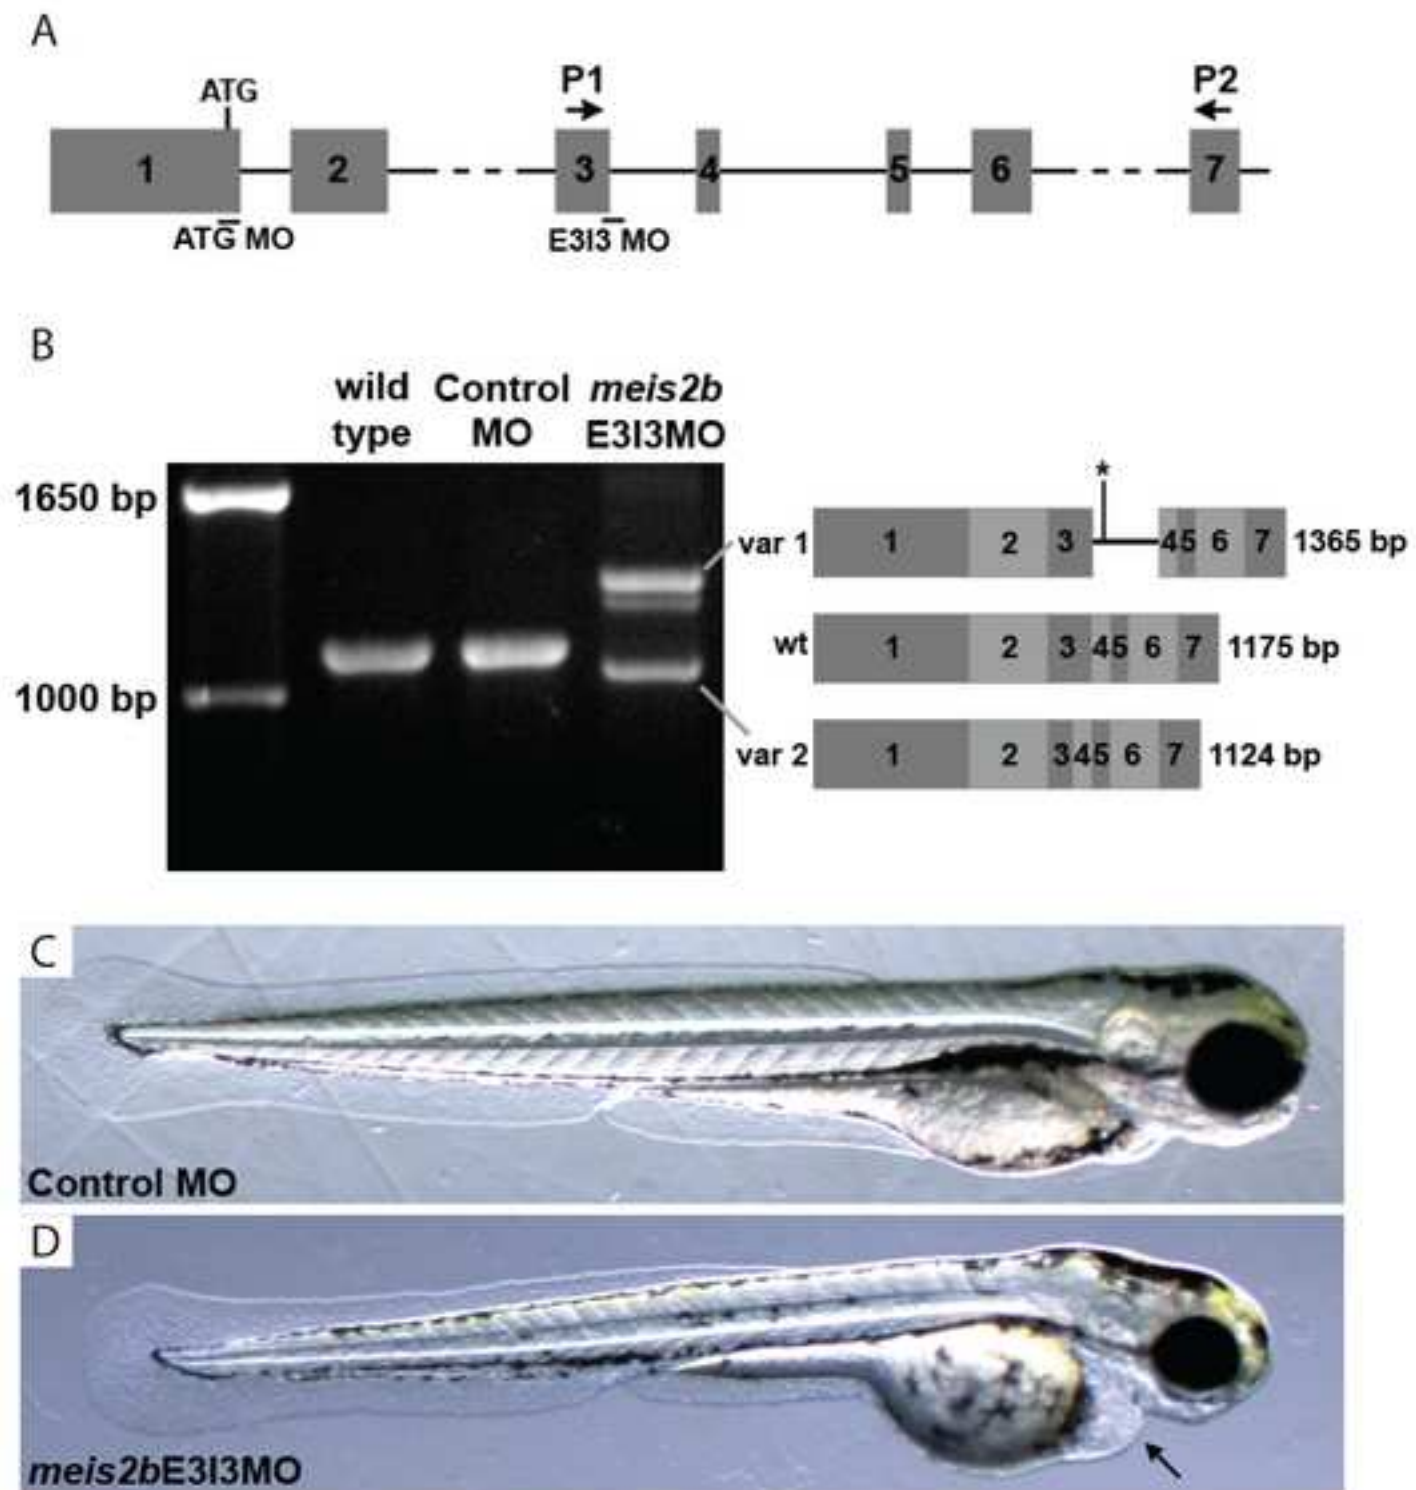

Supplement: NIHMS404285-supplement-02.pdf [file NIHMS404285-supplement-02.pdf]
